# Supplementary material for: The combination of multi-functional ingredients-loaded hydrogels and three-dimensional printed porous titanium alloys for infective bone defect treatment
Source: PubMed Central journal article supplement — J Tissue Eng. 2020 Oct 23;11:2041731420965797. doi: 10.1177/2041731420965797 (PMC7586025; doi:10.1177/2041731420965797), 2020-10-23
Supplement: Supplementary_Material.pdf [file Supplementary_Material.pdf]

## Supplementary data

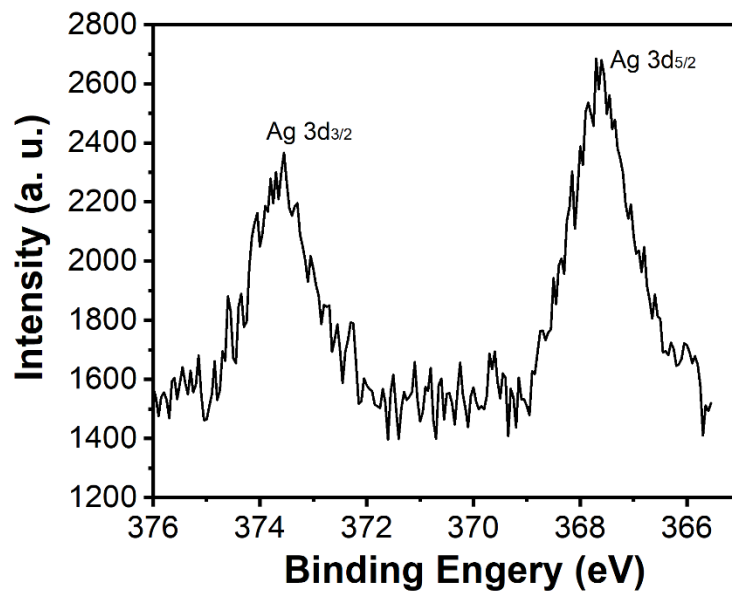

**Figure S1.** The high-resolution XPS spectrum of Ag 3d.

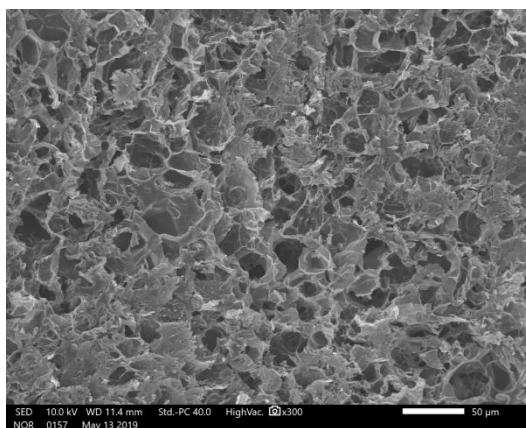

**Figure S2.** The SEM observation of supramolecular hydrogel.

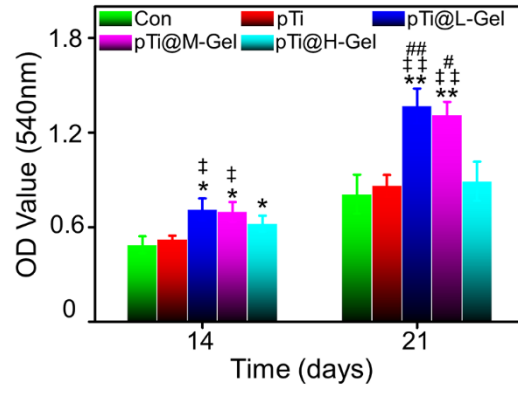

**Figure S3.** Quantitative analysis of AR staining of BMSCs cultured in the different scaffolds after osteogenic induction for 14 and 21 days.

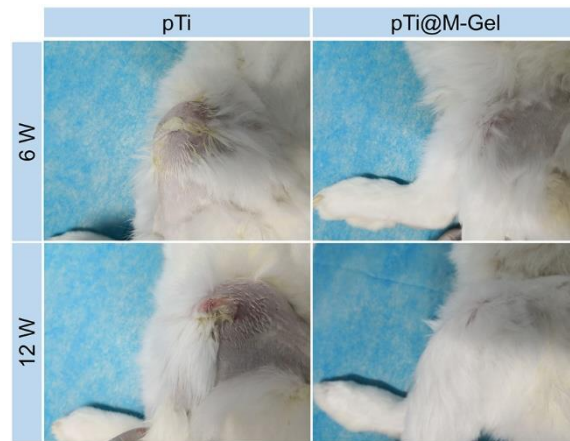

**Figure S4.** Gross images of surgical incision at 6 and 12 weeks after operation.

**Table S1.** Primer sequences of genes

---

| Gene subtype | Oligonucleotide Primers (5'-3')                          |
|--------------|----------------------------------------------------------|
| ALP          | F: ATC GGA CCC TGC CTT ACC<br>R: CTC TTG GGC TTG CTG TCG |
| Runx-2       | F: ACTACCAGCCACCGAGACCA<br>R: ACTGCTTGCAGCCTTAAATGACTCT  |
| OCN          | F: AGCCACCGAGACACCATGAGA<br>R: AGCCACCGAGACACCATGAGA     |
| BMP-2        | F: CAACACCGTGCTCAGCTTCC<br>R: TTCCCACTCATTTCTGAAAGTCC    |
| GAPDH        | F: CAATGACCCCTTCATTGACC<br>R: TGGACTCCACGACGTACTCA       |

---
